# Supplementary material for: Twisting and planarization in push–pull ethylenesElectronic supplementary information (ESI) available: tables of X-ray crystallographic bond lengths and angles of compounds 8–19 (including selected torsional angles and hydrogen bonds), X-ray crystal structures of compounds 10, 11, 13, 16, and 18 (Figs. S1–S5) and packing diagrams for 17·H2O and 19·H2O (Figs. S6–S7). See http://www.rsc.org/suppdata/p2/b1/b109624a/
Source: Royal Society of Chemistry journal article supplement (doi:10.1039/b109624a), 2002-02-04
Supplement: b109624a.pdf [file b109624a.pdf]

## Supplementary data

### Twisting and planarization in push-pull ethylenes

Paul V. Bernhardt, Rainer Koch,<sup>‡</sup> Daniel W. J. Moloney, Majed A. Shtaiwi and Curt Wentrup\*

*Department of Chemistry, The University of Queensland, Brisbane, Qld 4072, Australia*

*E-mail: [wentrup@chemistry.uq.edu.au](mailto:wentrup@chemistry.uq.edu.au)*

Tables S1-S12: X-ray crystallographic bond lengths and angles of compounds **8-19**

(including selected torsional angles and hydrogen bonds)

Figures S1-S5: X-ray structures of compounds **10, 11, 13, 16, and 18**.

Figures S6-S7: Packing diagrams for **17•H<sub>2</sub>O** and **19•H<sub>2</sub>O**.

---

<sup>‡</sup> Permanent address: Fachbereich Chemie der Carl von Ossietzky-Universität, D-26111

Oldenburg, Germany

Table S1. Bond lengths [Å] and angles [°] for compound **8**

Code number 1091dm9.

|            |          |
|------------|----------|
| O(1)-C(6)  | 1.368(3) |
| O(1)-C(2)  | 1.429(3) |
| C(2)-O(3)  | 1.430(3) |
| C(2)-C(22) | 1.505(4) |
| C(2)-C(21) | 1.505(3) |
| O(3)-C(4)  | 1.363(3) |
| C(4)-O(4)  | 1.220(3) |
| C(4)-C(5)  | 1.425(3) |
| C(5)-C(7)  | 1.420(3) |
| C(5)-C(6)  | 1.426(3) |
| C(6)-O(6)  | 1.218(3) |
| C(7)-N(1)  | 1.322(3) |
| C(7)-N(2)  | 1.326(3) |
| N(2)-C(9)  | 1.440(3) |
| C(9)-C(10) | 1.512(4) |
| C(10)-N(1) | 1.443(3) |

|                  |            |
|------------------|------------|
| C(6)-O(1)-C(2)   | 117.79(18) |
| O(1)-C(2)-O(3)   | 110.68(19) |
| O(1)-C(2)-C(22)  | 110.3(2)   |
| O(3)-C(2)-C(22)  | 109.8(2)   |
| O(1)-C(2)-C(21)  | 106.8(2)   |
| O(3)-C(2)-C(21)  | 106.2(2)   |
| C(22)-C(2)-C(21) | 113.0(2)   |
| C(4)-O(3)-C(2)   | 117.76(18) |
| O(4)-C(4)-O(3)   | 116.2(2)   |
| O(4)-C(4)-C(5)   | 126.8(2)   |
| O(3)-C(4)-C(5)   | 116.9(2)   |
| C(7)-C(5)-C(4)   | 119.6(2)   |
| C(7)-C(5)-C(6)   | 119.1(2)   |
| C(4)-C(5)-C(6)   | 121.1(2)   |
| O(6)-C(6)-O(1)   | 116.4(2)   |
| O(6)-C(6)-C(5)   | 127.3(2)   |
| O(1)-C(6)-C(5)   | 116.3(2)   |
| N(1)-C(7)-N(2)   | 108.9(2)   |
| N(1)-C(7)-C(5)   | 125.8(2)   |

|                 |          |
|-----------------|----------|
| N(2)-C(7)-C(5)  | 125.3(2) |
| C(7)-N(2)-C(9)  | 112.4(2) |
| N(2)-C(9)-C(10) | 102.8(2) |
| N(1)-C(10)-C(9) | 102.6(2) |
| C(7)-N(1)-C(10) | 112.6(2) |

Torsion angles [°] for **8** (1091dm9).

|                      |           |
|----------------------|-----------|
| C(6)-O(1)-C(2)-O(3)  | 48.8(3)   |
| C(6)-O(1)-C(2)-C(22) | -72.9(3)  |
| C(6)-O(1)-C(2)-C(21) | 164.0(2)  |
| O(1)-C(2)-O(3)-C(4)  | -47.5(3)  |
| C(22)-C(2)-O(3)-C(4) | 74.5(3)   |
| C(21)-C(2)-O(3)-C(4) | -163.0(2) |
| C(2)-O(3)-C(4)-O(4)  | -159.8(2) |
| C(2)-O(3)-C(4)-C(5)  | 21.2(3)   |
| O(4)-C(4)-C(5)-C(7)  | 1.4(4)    |
| O(3)-C(4)-C(5)-C(7)  | -179.7(2) |
| O(4)-C(4)-C(5)-C(6)  | -172.7(3) |
| O(3)-C(4)-C(5)-C(6)  | 6.1(4)    |
| C(2)-O(1)-C(6)-O(6)  | 158.4(2)  |
| C(2)-O(1)-C(6)-C(5)  | -23.5(3)  |
| C(7)-C(5)-C(6)-O(6)  | -1.4(4)   |
| C(4)-C(5)-C(6)-O(6)  | 172.8(3)  |
| C(7)-C(5)-C(6)-O(1)  | -179.2(2) |
| C(4)-C(5)-C(6)-O(1)  | -5.0(4)   |
| C(4)-C(5)-C(7)-N(1)  | -177.2(3) |
| C(6)-C(5)-C(7)-N(1)  | -2.9(4)   |
| C(4)-C(5)-C(7)-N(2)  | 3.3(4)    |
| C(6)-C(5)-C(7)-N(2)  | 177.5(3)  |
| N(1)-C(7)-N(2)-C(9)  | 3.5(3)    |
| C(5)-C(7)-N(2)-C(9)  | -176.9(3) |
| C(7)-N(2)-C(9)-C(10) | -8.0(3)   |
| N(2)-C(9)-C(10)-N(1) | 8.8(3)    |
| N(2)-C(7)-N(1)-C(10) | 3.0(3)    |
| C(5)-C(7)-N(1)-C(10) | -176.6(3) |
| C(9)-C(10)-N(1)-C(7) | -7.7(3)   |

Hydrogen bonds with  $H..A < r(A) + 2.000$  Angstroms and  $\langle DHA \rangle > 110$  deg.

| D-H   | d(D-H) | d(H..A) | <DHA   | d(D..A) | A                       |
|-------|--------|---------|--------|---------|-------------------------|
| N2-H2 | 0.840  | 2.114   | 128.91 | 2.721   | O4                      |
| N2-H2 | 0.840  | 2.334   | 125.92 | 2.907   | O4 [ -x, -y+1, -z+2 ]   |
| N1-H1 | 0.855  | 2.135   | 125.83 | 2.725   | O6                      |
| N1-H1 | 0.855  | 2.311   | 125.44 | 2.892   | O6 [ -x+2, -y+2, -z+2 ] |

Table S2. Bond lengths [ $\approx$ ] and angles [ $\infty$ ] for compound **9**

Code number 1074dm8.

|                  |          |
|------------------|----------|
| O(1)-C(6)        | 1.375(4) |
| O(1)-C(2)        | 1.427(4) |
| C(2)-O(3)        | 1.441(4) |
| C(2)-C(12)       | 1.499(5) |
| C(2)-C(13)       | 1.511(5) |
| O(3)-C(4)        | 1.373(4) |
| C(4)-O(4)        | 1.220(4) |
| C(4)-C(5)        | 1.418(4) |
| C(5)-C(6)        | 1.428(4) |
| C(5)-C(7)        | 1.441(4) |
| C(6)-O(6)        | 1.219(4) |
| C(7)-N(72)       | 1.324(4) |
| C(7)-N(71)       | 1.328(4) |
| N(71)-C(10)      | 1.443(4) |
| N(71)-C(9)       | 1.465(4) |
| N(72)-C(11)      | 1.437(4) |
| N(72)-C(8)       | 1.458(4) |
| C(8)-C(9)        | 1.499(5) |
|                  |          |
| C(6)-O(1)-C(2)   | 117.5(2) |
| O(1)-C(2)-O(3)   | 109.8(2) |
| O(1)-C(2)-C(12)  | 107.2(3) |
| O(3)-C(2)-C(12)  | 105.8(3) |
| O(1)-C(2)-C(13)  | 110.2(3) |
| O(3)-C(2)-C(13)  | 110.5(3) |
| C(12)-C(2)-C(13) | 113.2(3) |

|                  |          |
|------------------|----------|
| C(4)-O(3)-C(2)   | 118.2(2) |
| O(4)-C(4)-O(3)   | 116.8(2) |
| O(4)-C(4)-C(5)   | 126.6(3) |
| O(3)-C(4)-C(5)   | 116.5(2) |
| C(4)-C(5)-C(6)   | 121.6(3) |
| C(4)-C(5)-C(7)   | 118.4(2) |
| C(6)-C(5)-C(7)   | 119.9(2) |
| O(6)-C(6)-O(1)   | 116.9(2) |
| O(6)-C(6)-C(5)   | 127.3(3) |
| O(1)-C(6)-C(5)   | 115.8(2) |
| N(72)-C(7)-N(71) | 110.8(3) |
| N(72)-C(7)-C(5)  | 123.5(3) |
| N(71)-C(7)-C(5)  | 125.7(3) |
| C(7)-N(71)-C(10) | 127.5(3) |
| C(7)-N(71)-C(9)  | 110.7(3) |
| C(10)-N(71)-C(9) | 121.6(3) |
| C(7)-N(72)-C(11) | 127.0(2) |
| C(7)-N(72)-C(8)  | 110.8(2) |
| C(11)-N(72)-C(8) | 122.1(2) |
| N(72)-C(8)-C(9)  | 103.4(2) |
| N(71)-C(9)-C(8)  | 103.1(2) |

#### Selected torsion angles

|                 |                    |
|-----------------|--------------------|
| 51.17 ( 0.35)   | C6 - O1 - C2 - O3  |
| 165.72 ( 0.27)  | C6 - O1 - C2 - C21 |
| -70.71 ( 0.32)  | C6 - O1 - C2 - C22 |
| -47.14 ( 0.35)  | O1 - C2 - O3 - C4  |
| -162.59 ( 0.27) | C21 - C2 - O3 - C4 |
| 74.56 ( 0.31)   | C22 - C2 - O3 - C4 |
| -163.63 ( 0.28) | C2 - O3 - C4 - O4  |
| 18.92 ( 0.38)   | C2 - O3 - C4 - C5  |
| -169.08 ( 0.31) | O4 - C4 - C5 - C6  |
| 8.09 ( 0.43)    | O3 - C4 - C5 - C6  |
| 7.32 ( 0.49)    | O4 - C4 - C5 - C7  |
| -175.52 ( 0.25) | O3 - C4 - C5 - C7  |
| 154.75 ( 0.30)  | C2 - O1 - C6 - O6  |
| -26.61 ( 0.39)  | C2 - O1 - C6 - C5  |
| 174.13 ( 0.32)  | C4 - C5 - C6 - O6  |

-2.22 ( 0.52) C7 - C5 - C6 - O6  
-4.35 ( 0.43) C4 - C5 - C6 - O1  
179.31 ( 0.26) C7 - C5 - C6 - O1  
54.58 ( 0.41) C4 - C5 - C7 - N2  
-128.96 ( 0.32) C6 - C5 - C7 - N2  
-124.11 ( 0.32) C4 - C5 - C7 - N1  
52.35 ( 0.44) C6 - C5 - C7 - N1  
-173.12 ( 0.30) N2 - C7 - N1 - C10  
5.72 ( 0.49) C5 - C7 - N1 - C10  
1.99 ( 0.37) N2 - C7 - N1 - C9  
-179.18 ( 0.29) C5 - C7 - N1 - C9  
-176.06 ( 0.30) N1 - C7 - N2 - C11  
5.07 ( 0.48) C5 - C7 - N2 - C11  
5.67 ( 0.36) N1 - C7 - N2 - C8  
-173.19 ( 0.28) C5 - C7 - N2 - C8  
-10.51 ( 0.38) C7 - N2 - C8 - C9  
171.13 ( 0.31) C11 - N2 - C8 - C9  
-8.31 ( 0.38) C7 - N1 - C9 - C8  
167.13 ( 0.30) C10 - N1 - C9 - C8  
10.72 ( 0.37) N2 - C8 - C9 - N1

Table S3. Bond lengths [ $\text{\AA}$ ] and angles [ $^\circ$ ] for compound **10**  
Code number CW3.

---

|           |          |
|-----------|----------|
| O(1)-C(6) | 1.365(3) |
| O(1)-C(2) | 1.442(3) |
| O(4)-C(4) | 1.225(3) |
| O(3)-C(4) | 1.364(3) |
| O(3)-C(2) | 1.432(3) |
| O(6)-C(6) | 1.219(3) |
| C(4)-C(5) | 1.425(4) |
| N(1)-C(7) | 1.322(3) |
| N(1)-C(8) | 1.445(3) |
| N(2)-C(7) | 1.337(3) |
| N(2)-C(9) | 1.452(3) |

|            |          |
|------------|----------|
| C(6)-C(5)  | 1.426(4) |
| C(5)-C(7)  | 1.444(4) |
| C(2)-C(22) | 1.498(4) |
| C(2)-C(21) | 1.502(4) |

|                  |          |
|------------------|----------|
| C(6)-O(1)-C(2)   | 118.0(2) |
| C(4)-O(3)-C(2)   | 117.7(2) |
| O(4)-C(4)-O(3)   | 115.9(2) |
| O(4)-C(4)-C(5)   | 127.1(3) |
| O(3)-C(4)-C(5)   | 116.8(2) |
| C(7)-N(1)-C(8)   | 124.8(3) |
| C(7)-N(2)-C(9)   | 125.9(2) |
| O(6)-C(6)-O(1)   | 116.0(2) |
| O(6)-C(6)-C(5)   | 127.2(3) |
| O(1)-C(6)-C(5)   | 116.8(2) |
| C(4)-C(5)-C(6)   | 118.9(2) |
| C(4)-C(5)-C(7)   | 119.5(2) |
| C(6)-C(5)-C(7)   | 120.3(2) |
| O(3)-C(2)-O(1)   | 108.3(2) |
| O(3)-C(2)-C(22)  | 106.7(2) |
| O(1)-C(2)-C(22)  | 106.4(2) |
| O(3)-C(2)-C(21)  | 111.2(2) |
| O(1)-C(2)-C(21)  | 111.1(2) |
| C(22)-C(2)-C(21) | 112.9(3) |
| N(1)-C(7)-N(2)   | 117.6(2) |
| N(1)-C(7)-C(5)   | 120.5(2) |
| N(2)-C(7)-C(5)   | 121.8(2) |

Selected torsion angles

|                                   |
|-----------------------------------|
| -164.15 ( 0.24) C2 - O3 - C4 - O4 |
| 20.49 ( 0.35) C2 - O3 - C4 - C5   |
| 165.56 ( 0.24) C2 - O1 - C6 - O6  |
| -16.24 ( 0.36) C2 - O1 - C6 - C5  |
| -159.22 ( 0.28) O4 - C4 - C5 - C6 |

15.55 ( 0.36) O3 - C4 - C5 - C6  
7.85 ( 0.44) O4 - C4 - C5 - C7  
-177.39 ( 0.24) O3 - C4 - C5 - C7  
160.39 ( 0.28) O6 - C6 - C5 - C4  
-17.58 ( 0.37) O1 - C6 - C5 - C4  
-6.57 ( 0.44) O6 - C6 - C5 - C7  
175.46 ( 0.23) O1 - C6 - C5 - C7  
-51.13 ( 0.32) C4 - O3 - C2 - O1  
-165.28 ( 0.24) C4 - O3 - C2 - C22  
71.18 ( 0.30) C4 - O3 - C2 - C21  
48.93 ( 0.32) C6 - O1 - C2 - O3  
163.29 ( 0.26) C6 - O1 - C2 - C22  
-73.41 ( 0.30) C6 - O1 - C2 - C21  
6.41 ( 0.40) C8 - N1 - C7 - N2  
-171.96 ( 0.26) C8 - N1 - C7 - C5  
-165.53 ( 0.27) C9 - N2 - C7 - N1  
12.81 ( 0.41) C9 - N2 - C7 - C5  
-135.65 ( 0.27) C4 - C5 - C7 - N1  
31.24 ( 0.38) C6 - C5 - C7 - N1  
46.06 ( 0.37) C4 - C5 - C7 - N2  
-147.06 ( 0.26) C6 - C5 - C7 - N2

Table S4. Bond lengths [Å] and angles [°] for compound **11**  
Code number 1738cw5.

---

|            |          |
|------------|----------|
| C(2)-O(1)  | 1.426(2) |
| C(2)-O(3)  | 1.446(2) |
| C(2)-C(22) | 1.500(3) |
| C(2)-C(21) | 1.502(3) |
| C(4)-O(4)  | 1.221(2) |
| C(4)-O(3)  | 1.358(2) |
| C(4)-C(5)  | 1.432(3) |
| C(5)-C(7)  | 1.425(3) |
| C(5)-C(6)  | 1.447(3) |



|                  |            |
|------------------|------------|
| C(6)-O(6)        | 1.213(2)   |
| C(6)-O(1)        | 1.364(3)   |
| C(7)-N(1)        | 1.307(3)   |
| C(7)-S(2)        | 1.750(2)   |
| C(8)-N(1)        | 1.454(3)   |
| C(9)-S(2)        | 1.787(3)   |
| O(1)-C(2)-O(3)   | 108.55(15) |
| O(1)-C(2)-C(22)  | 107.29(18) |
| O(3)-C(2)-C(22)  | 105.98(17) |
| O(1)-C(2)-C(21)  | 110.90(18) |
| O(3)-C(2)-C(21)  | 111.18(17) |
| C(22)-C(2)-C(21) | 112.70(19) |
| O(4)-C(4)-O(3)   | 116.02(18) |
| O(4)-C(4)-C(5)   | 126.46(19) |
| O(3)-C(4)-C(5)   | 117.51(17) |
| C(7)-C(5)-C(4)   | 119.17(18) |
| C(7)-C(5)-C(6)   | 121.32(18) |
| C(4)-C(5)-C(6)   | 118.10(18) |
| O(6)-C(6)-O(1)   | 116.82(18) |
| O(6)-C(6)-C(5)   | 127.0(2)   |
| O(1)-C(6)-C(5)   | 115.98(17) |
| N(1)-C(7)-C(5)   | 121.54(18) |
| N(1)-C(7)-S(2)   | 114.68(16) |
| C(5)-C(7)-S(2)   | 123.76(15) |
| C(7)-N(1)-C(8)   | 126.58(19) |
| C(6)-O(1)-C(2)   | 117.95(15) |
| C(4)-O(3)-C(2)   | 118.30(15) |
| C(7)-S(2)-C(9)   | 103.34(11) |

Selected torsion angles

|                                   |
|-----------------------------------|
| 8.24 ( 0.35) O4 - C4 - C5 - C7    |
| -172.96 ( 0.18) O3 - C4 - C5 - C7 |
| -158.36 ( 0.22) O4 - C4 - C5 - C6 |

20.44 ( 0.29) O3 - C4 - C5 - C6  
-6.59 ( 0.33) C7 - C5 - C6 - O6  
159.71 ( 0.21) C4 - C5 - C6 - O6  
179.04 ( 0.17) C7 - C5 - C6 - O1  
-14.66 ( 0.27) C4 - C5 - C6 - O1  
-21.20 ( 0.30) C4 - C5 - C7 - N1  
144.96 ( 0.21) C6 - C5 - C7 - N1  
157.07 ( 0.16) C4 - C5 - C7 - S2  
-36.78 ( 0.27) C6 - C5 - C7 - S2  
173.74 ( 0.20) C5 - C7 - N1 - C8  
-4.67 ( 0.30) S2 - C7 - N1 - C8  
161.71 ( 0.18) O6 - C6 - O1 - C2  
-23.33 ( 0.25) C5 - C6 - O1 - C2  
52.71 ( 0.22) O3 - C2 - O1 - C6  
166.83 ( 0.17) C22 - C2 - O1 - C6  
-69.70 ( 0.21) C21 - C2 - O1 - C6  
-169.49 ( 0.20) O4 - C4 - O3 - C2  
11.59 ( 0.28) C5 - C4 - O3 - C2  
-46.37 ( 0.24) O1 - C2 - O3 - C4  
-161.34 ( 0.19) C22 - C2 - O3 - C4  
75.87 ( 0.23) C21 - C2 - O3 - C4  
147.74 ( 0.18) N1 - C7 - S2 - C9  
-30.64 ( 0.21) C5 - C7 - S2 - C9

Hydrogen bonds with  $H..A < r(A) + 2.000$  Angstroms and  $<DHA > 110$  deg.

| D-H   | d(D-H) | d(H..A) | <DHA   | d(D..A) | A                     |
|-------|--------|---------|--------|---------|-----------------------|
| N1-H1 | 0.860  | 2.069   | 126.73 | 2.674   | O4                    |
| N1-H1 | 0.860  | 2.287   | 139.38 | 2.992   | O4 [ -x+1, -y, -z+1 ] |

Table S5. Bond lengths [ $\text{\AA}$ ] and angles [ $^\circ$ ] for compound **12**

Code number1005dm4.

|            |          |
|------------|----------|
| C(2)-O(3)  | 1.431(2) |
| C(2)-O(1)  | 1.439(2) |
| C(2)-C(22) | 1.505(3) |

|             |            |
|-------------|------------|
| C(2)-C(21)  | 1.509(3)   |
| C(4)-O(4)   | 1.213(2)   |
| C(4)-O(3)   | 1.360(2)   |
| C(4)-C(5)   | 1.441(3)   |
| C(5)-C(7)   | 1.410(2)   |
| C(5)-C(6)   | 1.445(3)   |
| C(6)-O(6)   | 1.220(2)   |
| C(6)-O(1)   | 1.354(2)   |
| C(7)-N(1)   | 1.326(2)   |
| C(7)-S(2)   | 1.7488(19) |
| C(9)-S(2)   | 1.797(2)   |
| C(11)-C(16) | 1.366(3)   |
| C(11)-C(12) | 1.372(3)   |
| C(11)-N(1)  | 1.434(2)   |
| C(12)-C(13) | 1.381(3)   |
| C(13)-C(14) | 1.362(4)   |
| C(14)-C(15) | 1.369(4)   |
| C(15)-C(16) | 1.370(3)   |

|                   |            |
|-------------------|------------|
| O(3)-C(2)-O(1)    | 109.09(15) |
| O(3)-C(2)-C(22)   | 106.38(17) |
| O(1)-C(2)-C(22)   | 106.40(16) |
| O(3)-C(2)-C(21)   | 110.74(17) |
| O(1)-C(2)-C(21)   | 110.94(18) |
| C(22)-C(2)-C(21)  | 113.06(18) |
| O(4)-C(4)-O(3)    | 116.68(17) |
| O(4)-C(4)-C(5)    | 126.82(18) |
| O(3)-C(4)-C(5)    | 116.35(16) |
| C(7)-C(5)-C(4)    | 121.56(16) |
| C(7)-C(5)-C(6)    | 119.39(17) |
| C(4)-C(5)-C(6)    | 118.53(16) |
| O(6)-C(6)-O(1)    | 116.51(17) |
| O(6)-C(6)-C(5)    | 126.79(18) |
| O(1)-C(6)-C(5)    | 116.68(17) |
| N(1)-C(7)-C(5)    | 121.62(16) |
| N(1)-C(7)-S(2)    | 113.75(14) |
| C(5)-C(7)-S(2)    | 124.60(14) |
| C(16)-C(11)-C(12) | 120.9(2)   |

|                   |            |
|-------------------|------------|
| C(16)-C(11)-N(1)  | 119.36(18) |
| C(12)-C(11)-N(1)  | 119.77(19) |
| C(11)-C(12)-C(13) | 119.0(2)   |
| C(14)-C(13)-C(12) | 120.3(2)   |
| C(13)-C(14)-C(15) | 119.9(2)   |
| C(14)-C(15)-C(16) | 120.5(3)   |
| C(11)-C(16)-C(15) | 119.4(2)   |
| C(7)-N(1)-C(11)   | 125.29(16) |
| C(6)-O(1)-C(2)    | 118.50(14) |
| C(4)-O(3)-C(2)    | 118.24(15) |
| C(7)-S(2)-C(9)    | 105.02(10) |

Torsion angles [°] for **12** (1005dm4).

|                         |             |
|-------------------------|-------------|
| O(4)-C(4)-C(5)-C(7)     | 12.8(3)     |
| O(3)-C(4)-C(5)-C(7)     | -172.00(17) |
| O(4)-C(4)-C(5)-C(6)     | -158.9(2)   |
| O(3)-C(4)-C(5)-C(6)     | 16.3(3)     |
| C(7)-C(5)-C(6)-O(6)     | -11.4(3)    |
| C(4)-C(5)-C(6)-O(6)     | 160.5(2)    |
| C(7)-C(5)-C(6)-O(1)     | 169.88(17)  |
| C(4)-C(5)-C(6)-O(1)     | -18.2(3)    |
| C(4)-C(5)-C(7)-N(1)     | -147.02(19) |
| C(6)-C(5)-C(7)-N(1)     | 24.6(3)     |
| C(4)-C(5)-C(7)-S(2)     | 34.6(3)     |
| C(6)-C(5)-C(7)-S(2)     | -153.74(15) |
| C(16)-C(11)-C(12)-C(13) | -0.6(3)     |
| N(1)-C(11)-C(12)-C(13)  | 179.5(2)    |
| C(11)-C(12)-C(13)-C(14) | 1.2(4)      |
| C(12)-C(13)-C(14)-C(15) | -0.8(4)     |
| C(13)-C(14)-C(15)-C(16) | -0.2(4)     |
| C(12)-C(11)-C(16)-C(15) | -0.3(3)     |
| N(1)-C(11)-C(16)-C(15)  | 179.6(2)    |
| C(14)-C(15)-C(16)-C(11) | 0.7(4)      |
| C(5)-C(7)-N(1)-C(11)    | -169.82(19) |
| S(2)-C(7)-N(1)-C(11)    | 8.7(3)      |
| C(16)-C(11)-N(1)-C(7)   | 87.8(3)     |
| C(12)-C(11)-N(1)-C(7)   | -92.3(3)    |
| O(6)-C(6)-O(1)-C(2)     | 165.81(17)  |

|                      |             |
|----------------------|-------------|
| C(5)-C(6)-O(1)-C(2)  | -15.3(2)    |
| O(3)-C(2)-O(1)-C(6)  | 48.0(2)     |
| C(22)-C(2)-O(1)-C(6) | 162.40(18)  |
| C(21)-C(2)-O(1)-C(6) | -74.2(2)    |
| O(4)-C(4)-O(3)-C(2)  | -165.04(17) |
| C(5)-C(4)-O(3)-C(2)  | 19.2(2)     |
| O(1)-C(2)-O(3)-C(4)  | -50.1(2)    |
| C(22)-C(2)-O(3)-C(4) | -164.50(17) |
| C(21)-C(2)-O(3)-C(4) | 72.3(2)     |
| N(1)-C(7)-S(2)-C(9)  | -152.39(16) |
| C(5)-C(7)-S(2)-C(9)  | 26.1(2)     |

Hydrogen bonds with  $H..A < r(A) + 2.000$  Angstroms and  $<DHA > 110$  deg.

| D-H   | d(D-H) | d(H..A) | <DHA   | d(D..A) | A                            |
|-------|--------|---------|--------|---------|------------------------------|
| N1-H1 | 0.888  | 2.068   | 128.31 | 2.710   | O6                           |
| N1-H1 | 0.888  | 2.450   | 144.13 | 3.212   | O6 [ -x+1/2, y+1/2, -z+1/2 ] |

Table S6. Bond lengths [ $\text{\AA}$ ] and angles [ $^\circ$ ] for compound **13**  
Code number CW9187.

---

|            |          |
|------------|----------|
| C(2)-O(3)  | 1.425(3) |
| C(2)-O(1)  | 1.439(3) |
| C(2)-C(22) | 1.502(5) |
| C(2)-C(21) | 1.506(5) |
| C(4)-O(4)  | 1.207(3) |
| C(4)-O(3)  | 1.372(3) |
| C(4)-C(5)  | 1.445(4) |
| C(5)-C(7)  | 1.415(4) |
| C(5)-C(6)  | 1.437(4) |
| C(6)-O(6)  | 1.212(3) |
| C(6)-O(1)  | 1.358(3) |
| C(7)-N(1)  | 1.320(4) |
| C(7)-S(1)  | 1.747(3) |

|             |          |
|-------------|----------|
| C(8)-S(1)   | 1.785(3) |
| C(9)-C(14)  | 1.397(4) |
| C(9)-C(10)  | 1.399(5) |
| C(9)-N(1)   | 1.437(4) |
| C(10)-C(11) | 1.380(5) |
| C(10)-C(15) | 1.509(5) |
| C(11)-C(12) | 1.372(5) |
| C(12)-C(13) | 1.366(6) |
| C(13)-C(14) | 1.377(4) |
| C(14)-C(17) | 1.518(5) |
| C(15)-C(16) | 1.429(6) |
| C(17)-C(18) | 1.512(5) |

|                  |          |
|------------------|----------|
| O(3)-C(2)-O(1)   | 109.2(2) |
| O(3)-C(2)-C(22)  | 106.6(3) |
| O(1)-C(2)-C(22)  | 105.7(3) |
| O(3)-C(2)-C(21)  | 110.7(3) |
| O(1)-C(2)-C(21)  | 111.0(3) |
| C(22)-C(2)-C(21) | 113.4(3) |
| O(4)-C(4)-O(3)   | 116.4(2) |
| O(4)-C(4)-C(5)   | 127.9(2) |
| O(3)-C(4)-C(5)   | 115.7(2) |
| C(7)-C(5)-C(6)   | 121.7(3) |
| C(7)-C(5)-C(4)   | 118.9(2) |
| C(6)-C(5)-C(4)   | 118.7(2) |
| O(6)-C(6)-O(1)   | 116.5(2) |
| O(6)-C(6)-C(5)   | 126.3(2) |
| O(1)-C(6)-C(5)   | 117.1(2) |
| N(1)-C(7)-C(5)   | 121.0(3) |
| N(1)-C(7)-S(1)   | 114.2(2) |
| C(5)-C(7)-S(1)   | 124.8(2) |
| C(14)-C(9)-C(10) | 122.5(3) |
| C(14)-C(9)-N(1)  | 118.8(3) |
| C(10)-C(9)-N(1)  | 118.7(3) |

|                   |            |
|-------------------|------------|
| C(11)-C(10)-C(9)  | 117.2(3)   |
| C(11)-C(10)-C(15) | 121.9(3)   |
| C(9)-C(10)-C(15)  | 120.9(3)   |
| C(12)-C(11)-C(10) | 121.5(3)   |
| C(13)-C(12)-C(11) | 119.9(3)   |
| C(12)-C(13)-C(14) | 122.0(3)   |
| C(13)-C(14)-C(9)  | 117.0(3)   |
| C(13)-C(14)-C(17) | 123.4(3)   |
| C(9)-C(14)-C(17)  | 119.6(3)   |
| C(16)-C(15)-C(10) | 116.7(4)   |
| C(18)-C(17)-C(14) | 116.0(3)   |
| C(7)-N(1)-C(9)    | 126.7(3)   |
| C(6)-O(1)-C(2)    | 118.4(2)   |
| C(4)-O(3)-C(2)    | 118.5(2)   |
| C(7)-S(1)-C(8)    | 105.28(15) |

Torsion angles [°] for **13** (CW9187).

|                        |           |
|------------------------|-----------|
| O(4)-C(4)-C(5)-C(7)    | -7.1(4)   |
| O(3)-C(4)-C(5)-C(7)    | 173.3(2)  |
| O(4)-C(4)-C(5)-C(6)    | 163.9(3)  |
| O(3)-C(4)-C(5)-C(6)    | -15.7(4)  |
| C(7)-C(5)-C(6)-O(6)    | 13.3(5)   |
| C(4)-C(5)-C(6)-O(6)    | -157.4(3) |
| C(7)-C(5)-C(6)-O(1)    | -170.8(3) |
| C(4)-C(5)-C(6)-O(1)    | 18.5(4)   |
| C(6)-C(5)-C(7)-N(1)    | -146.2(3) |
| C(4)-C(5)-C(7)-N(1)    | 24.5(4)   |
| C(6)-C(5)-C(7)-S(1)    | 35.8(4)   |
| C(4)-C(5)-C(7)-S(1)    | -153.5(2) |
| C(14)-C(9)-C(10)-C(11) | 0.9(5)    |
| N(1)-C(9)-C(10)-C(11)  | 178.7(3)  |
| C(14)-C(9)-C(10)-C(15) | 179.9(3)  |
| N(1)-C(9)-C(10)-C(15)  | -2.4(5)   |
| C(9)-C(10)-C(11)-C(12) | -0.5(6)   |

|                         |           |
|-------------------------|-----------|
| C(15)-C(10)-C(11)-C(12) | -179.5(4) |
| C(10)-C(11)-C(12)-C(13) | 0.2(7)    |
| C(11)-C(12)-C(13)-C(14) | -0.2(7)   |
| C(12)-C(13)-C(14)-C(9)  | 0.6(6)    |
| C(12)-C(13)-C(14)-C(17) | 179.6(4)  |
| C(10)-C(9)-C(14)-C(13)  | -1.0(5)   |
| N(1)-C(9)-C(14)-C(13)   | -178.7(3) |
| C(10)-C(9)-C(14)-C(17)  | 180.0(3)  |
| N(1)-C(9)-C(14)-C(17)   | 2.3(5)    |
| C(11)-C(10)-C(15)-C(16) | -30.2(7)  |
| C(9)-C(10)-C(15)-C(16)  | 150.9(5)  |
| C(13)-C(14)-C(17)-C(18) | 9.4(6)    |
| C(9)-C(14)-C(17)-C(18)  | -171.6(4) |
| C(5)-C(7)-N(1)-C(9)     | -166.1(3) |
| S(1)-C(7)-N(1)-C(9)     | 12.1(4)   |
| C(14)-C(9)-N(1)-C(7)    | -102.8(4) |
| C(10)-C(9)-N(1)-C(7)    | 79.4(4)   |
| O(6)-C(6)-O(1)-C(2)     | -169.3(2) |
| C(5)-C(6)-O(1)-C(2)     | 14.4(4)   |
| O(3)-C(2)-O(1)-C(6)     | -47.3(3)  |
| C(22)-C(2)-O(1)-C(6)    | -161.7(3) |
| C(21)-C(2)-O(1)-C(6)    | 75.0(3)   |
| O(4)-C(4)-O(3)-C(2)     | 160.2(2)  |
| C(5)-C(4)-O(3)-C(2)     | -20.1(3)  |
| O(1)-C(2)-O(3)-C(4)     | 50.4(3)   |
| C(22)-C(2)-O(3)-C(4)    | 164.2(2)  |
| C(21)-C(2)-O(3)-C(4)    | -72.1(3)  |
| N(1)-C(7)-S(1)-C(8)     | -153.6(2) |
| C(5)-C(7)-S(1)-C(8)     | 24.5(3)   |

---

Hydrogen bonds with  $H..A < r(A) + 2.000$  Angstroms and  $\langle DHA \rangle > 110$  deg.

D-H (D-H) d(H..A)  $\langle DHA \rangle$  d(D..A) A



N1-H1 0.860 2.191 118.25 2.707 O4  
N1-H1 0.860 2.278 142.19 3.004 O6 [ -x+1, y+1/2, -z+3/2 ]

Table S7. Bond lengths [Å] and angles [°] for compound **14**  
Code number 989dm3.

---

|                  |          |
|------------------|----------|
| C(2)-O(3)        | 1.428(3) |
| C(2)-O(1)        | 1.442(3) |
| C(2)-C(22)       | 1.500(4) |
| C(2)-C(21)       | 1.504(4) |
| C(4)-O(4)        | 1.209(3) |
| C(4)-O(3)        | 1.372(3) |
| C(4)-C(5)        | 1.443(4) |
| C(5)-C(7)        | 1.413(4) |
| C(5)-C(6)        | 1.437(4) |
| C(6)-O(6)        | 1.224(3) |
| C(6)-O(1)        | 1.363(3) |
| C(7)-N(1)        | 1.321(3) |
| C(7)-O(2)        | 1.325(3) |
| C(10)-O(2)       | 1.462(4) |
| C(11)-C(12)      | 1.374(4) |
| C(11)-C(16)      | 1.374(4) |
| C(11)-N(1)       | 1.433(3) |
| C(12)-C(13)      | 1.385(4) |
| C(13)-C(14)      | 1.366(4) |
| C(14)-C(15)      | 1.367(5) |
| C(15)-C(16)      | 1.386(4) |
|                  |          |
| O(3)-C(2)-O(1)   | 109.4(2) |
| O(3)-C(2)-C(22)  | 106.6(2) |
| O(1)-C(2)-C(22)  | 105.5(2) |
| O(3)-C(2)-C(21)  | 111.1(2) |
| O(1)-C(2)-C(21)  | 110.4(2) |
| C(22)-C(2)-C(21) | 113.7(3) |
| O(4)-C(4)-O(3)   | 116.3(3) |
| O(4)-C(4)-C(5)   | 127.4(3) |
| O(3)-C(4)-C(5)   | 116.2(2) |

|                   |          |
|-------------------|----------|
| C(7)-C(5)-C(6)    | 119.1(2) |
| C(7)-C(5)-C(4)    | 120.7(3) |
| C(6)-C(5)-C(4)    | 118.8(2) |
| O(6)-C(6)-O(1)    | 115.7(3) |
| O(6)-C(6)-C(5)    | 126.9(3) |
| O(1)-C(6)-C(5)    | 117.4(2) |
| N(1)-C(7)-O(2)    | 113.9(3) |
| N(1)-C(7)-C(5)    | 121.9(3) |
| O(2)-C(7)-C(5)    | 124.2(2) |
| C(12)-C(11)-C(16) | 119.6(3) |
| C(12)-C(11)-N(1)  | 116.1(3) |
| C(16)-C(11)-N(1)  | 124.2(3) |
| C(11)-C(12)-C(13) | 120.6(3) |
| C(14)-C(13)-C(12) | 119.3(3) |
| C(13)-C(14)-C(15) | 120.6(3) |
| C(14)-C(15)-C(16) | 120.0(3) |
| C(11)-C(16)-C(15) | 119.8(3) |
| C(7)-N(1)-C(11)   | 129.7(3) |
| C(6)-O(1)-C(2)    | 118.3(2) |
| C(7)-O(2)-C(10)   | 120.7(2) |
| C(4)-O(3)-C(2)    | 118.0(2) |

Torsion angles [°] for **7** (989dm<sup>3</sup>).

|                         |           |
|-------------------------|-----------|
| O(4)-C(4)-C(5)-C(7)     | 2.9(5)    |
| O(3)-C(4)-C(5)-C(7)     | 179.1(2)  |
| O(4)-C(4)-C(5)-C(6)     | -163.4(3) |
| O(3)-C(4)-C(5)-C(6)     | 12.8(4)   |
| C(7)-C(5)-C(6)-O(6)     | -4.9(4)   |
| C(4)-C(5)-C(6)-O(6)     | 161.6(3)  |
| C(7)-C(5)-C(6)-O(1)     | 176.7(2)  |
| C(4)-C(5)-C(6)-O(1)     | -16.8(4)  |
| C(6)-C(5)-C(7)-N(1)     | 15.6(4)   |
| C(4)-C(5)-C(7)-N(1)     | -150.7(3) |
| C(6)-C(5)-C(7)-O(2)     | -165.6(3) |
| C(4)-C(5)-C(7)-O(2)     | 28.1(4)   |
| C(16)-C(11)-C(12)-C(13) | 2.4(4)    |
| N(1)-C(11)-C(12)-C(13)  | -179.8(3) |
| C(11)-C(12)-C(13)-C(14) | -1.0(5)   |

|                         |           |
|-------------------------|-----------|
| C(12)-C(13)-C(14)-C(15) | -0.9(5)   |
| C(13)-C(14)-C(15)-C(16) | 1.3(5)    |
| C(12)-C(11)-C(16)-C(15) | -2.0(4)   |
| N(1)-C(11)-C(16)-C(15)  | -179.5(3) |
| C(14)-C(15)-C(16)-C(11) | 0.2(5)    |
| O(2)-C(7)-N(1)-C(11)    | 9.3(4)    |
| C(5)-C(7)-N(1)-C(11)    | -171.8(3) |
| C(12)-C(11)-N(1)-C(7)   | 148.1(3)  |
| C(16)-C(11)-N(1)-C(7)   | -34.3(4)  |
| O(6)-C(6)-O(1)-C(2)     | 167.1(2)  |
| C(5)-C(6)-O(1)-C(2)     | -14.3(4)  |
| O(3)-C(2)-O(1)-C(6)     | 46.7(3)   |
| C(22)-C(2)-O(1)-C(6)    | 161.0(2)  |
| C(21)-C(2)-O(1)-C(6)    | -75.8(3)  |
| N(1)-C(7)-O(2)-C(10)    | -142.1(3) |
| C(5)-C(7)-O(2)-C(10)    | 39.0(4)   |
| O(4)-C(4)-O(3)-C(2)     | -160.9(3) |
| C(5)-C(4)-O(3)-C(2)     | 22.4(3)   |
| O(1)-C(2)-O(3)-C(4)     | -51.1(3)  |
| C(22)-C(2)-O(3)-C(4)    | -164.6(2) |
| C(21)-C(2)-O(3)-C(4)    | 71.0(3)   |

Hydrogen bonds with  $H..A < r(A) + 2.000$  Angstroms and  $\langle DHA \rangle > 110$  deg.

| D-H | d(D-H) | d(H..A) | $\langle DHA \rangle$ | d(D..A) | A |
|-----|--------|---------|-----------------------|---------|---|
|-----|--------|---------|-----------------------|---------|---|

|       |       |       |        |       |    |
|-------|-------|-------|--------|-------|----|
| N1-H1 | 0.933 | 1.895 | 137.68 | 2.660 | O6 |
|-------|-------|-------|--------|-------|----|

Table S8. Bond lengths [ $\text{\AA}$ ] and angles [ $^\circ$ ] for compound **15**

Code number cw1168.

|            |          |
|------------|----------|
| C(2)-O(3)  | 1.428(5) |
| C(2)-O(1)  | 1.440(4) |
| C(2)-C(22) | 1.489(5) |
| C(2)-C(21) | 1.499(5) |
| C(4)-O(4)  | 1.233(5) |
| C(4)-O(3)  | 1.351(5) |

|             |          |
|-------------|----------|
| C(4)-C(5)   | 1.440(5) |
| C(5)-C(6)   | 1.421(5) |
| C(5)-C(7)   | 1.438(5) |
| C(6)-O(6)   | 1.233(4) |
| C(6)-O(1)   | 1.352(4) |
| C(7)-N(2)   | 1.326(4) |
| C(7)-N(1)   | 1.343(5) |
| C(8)-C(13)  | 1.369(5) |
| C(8)-C(9)   | 1.386(6) |
| C(8)-N(1)   | 1.424(5) |
| C(9)-C(10)  | 1.365(6) |
| C(10)-C(11) | 1.377(6) |
| C(11)-C(12) | 1.363(6) |
| C(12)-C(13) | 1.362(6) |
| C(14)-N(2)  | 1.450(5) |

|                  |          |
|------------------|----------|
| O(3)-C(2)-O(1)   | 108.5(3) |
| O(3)-C(2)-C(22)  | 106.4(3) |
| O(1)-C(2)-C(22)  | 106.6(3) |
| O(3)-C(2)-C(21)  | 110.8(3) |
| O(1)-C(2)-C(21)  | 109.9(3) |
| C(22)-C(2)-C(21) | 114.4(4) |
| O(4)-C(4)-O(3)   | 116.0(4) |
| O(4)-C(4)-C(5)   | 126.6(5) |
| O(3)-C(4)-C(5)   | 117.3(4) |
| C(6)-C(5)-C(7)   | 120.5(3) |
| C(6)-C(5)-C(4)   | 118.7(4) |
| C(7)-C(5)-C(4)   | 120.6(4) |
| O(6)-C(6)-O(1)   | 116.0(4) |
| O(6)-C(6)-C(5)   | 126.2(4) |
| O(1)-C(6)-C(5)   | 117.8(3) |
| N(2)-C(7)-N(1)   | 120.7(4) |
| N(2)-C(7)-C(5)   | 120.1(4) |
| N(1)-C(7)-C(5)   | 119.1(3) |

|                   |          |
|-------------------|----------|
| C(13)-C(8)-C(9)   | 119.4(4) |
| C(13)-C(8)-N(1)   | 123.2(4) |
| C(9)-C(8)-N(1)    | 117.2(4) |
| C(10)-C(9)-C(8)   | 119.5(4) |
| C(9)-C(10)-C(11)  | 121.0(4) |
| C(12)-C(11)-C(10) | 118.9(5) |
| C(13)-C(12)-C(11) | 121.0(5) |
| C(12)-C(13)-C(8)  | 120.4(4) |
| C(7)-N(1)-C(8)    | 128.1(3) |
| C(7)-N(2)-C(14)   | 126.6(3) |
| C(6)-O(1)-C(2)    | 118.1(3) |
| C(4)-O(3)-C(2)    | 117.7(3) |

Selected torsion angles

|                 |                       |
|-----------------|-----------------------|
| 170.38 ( 0.42)  | O4 - C4 - C5 - C6     |
| -7.69 ( 0.51)   | O3 - C4 - C5 - C6     |
| -4.79 ( 0.62)   | O4 - C4 - C5 - C7     |
| 177.14 ( 0.33)  | O3 - C4 - C5 - C7     |
| 8.33 ( 0.58)    | C7 - C5 - C6 - O6     |
| -166.85 ( 0.35) | C4 - C5 - C6 - O6     |
| -175.18 ( 0.31) | C7 - C5 - C6 - O1     |
| 9.64 ( 0.50)    | C4 - C5 - C6 - O1     |
| 5.75 ( 0.54)    | C6 - C5 - C7 - N2     |
| -179.17 ( 0.34) | C4 - C5 - C7 - N2     |
| -177.96 ( 0.35) | C6 - C5 - C7 - N1     |
| -2.88 ( 0.53)   | C4 - C5 - C7 - N1     |
| 1.48 ( 0.61)    | C13 - C8 - C9 - C10   |
| 176.54 ( 0.38)  | N1 - C8 - C9 - C10    |
| -0.10 ( 0.71)   | C8 - C9 - C10 - C11   |
| -0.56 ( 0.75)   | C9 - C10 - C11 - C12  |
| -0.15 ( 0.74)   | C10 - C11 - C12 - C13 |
| 1.54 ( 0.70)    | C11 - C12 - C13 - C8  |
| -2.19 ( 0.61)   | C9 - C8 - C13 - C12   |
| -176.94 ( 0.38) | N1 - C8 - C13 - C12   |

-32.55 ( 0.60) N2 - C7 - N1 - C8  
151.18 ( 0.37) C5 - C7 - N1 - C8  
-31.83 ( 0.62) C13 - C8 - N1 - C7  
153.31 ( 0.40) C9 - C8 - N1 - C7  
-19.39 ( 0.62) N1 - C7 - N2 - C14  
156.84 ( 0.41) C5 - C7 - N2 - C14  
-162.95 ( 0.32) O6 - C6 - O1 - C2  
20.20 ( 0.47) C5 - C6 - O1 - C2  
-49.10 ( 0.41) O3 - C2 - O1 - C6  
-163.39 ( 0.35) C22 - C2 - O1 - C6  
72.12 ( 0.45) C21 - C2 - O1 - C6  
157.40 ( 0.36) O4 - C4 - O3 - C2  
-24.33 ( 0.48) C5 - C4 - O3 - C2  
51.15 ( 0.41) O1 - C2 - O3 - C4  
165.54 ( 0.34) C22 - C2 - O3 - C4  
-69.50 ( 0.41) C21 - C2 - O3 - C4

Hydrogen bonds with H..A < r(A) + 2.000 Angstroms and <DHA > 110 deg.

| D-H   | d(D-H) | d(H..A) | <DHA   | d(D..A) | A                     |
|-------|--------|---------|--------|---------|-----------------------|
| N1-H1 | 0.860  | 2.095   | 121.15 | 2.645   | O4                    |
| N2-H2 | 0.860  | 1.991   | 132.93 | 2.652   | O6                    |
| N2-H2 | 0.860  | 2.518   | 131.07 | 3.150   | O6 [ -x+2, -y, -z+2 ] |

Table S9. Bond lengths [Å] and angles [°] for compound **16**  
Code number 1794r31.

---

|            |          |
|------------|----------|
| C(2)-O(1)  | 1.428(3) |
| C(2)-O(3)  | 1.439(3) |
| C(2)-C(21) | 1.506(4) |
| C(2)-C(22) | 1.507(4) |
| C(4)-O(4)  | 1.218(3) |
| C(4)-O(3)  | 1.358(3) |
| C(4)-C(5)  | 1.439(3) |
| C(5)-C(7)  | 1.421(3) |
| C(5)-C(6)  | 1.441(3) |

|             |          |
|-------------|----------|
| C(6)-O(6)   | 1.211(3) |
| C(6)-O(1)   | 1.363(3) |
| C(7)-N(2)   | 1.347(3) |
| C(7)-N(1)   | 1.349(3) |
| C(8)-N(2)   | 1.449(4) |
| C(9)-N(2)   | 1.461(4) |
| C(10)-C(15) | 1.384(4) |
| C(10)-C(11) | 1.399(3) |
| C(10)-N(1)  | 1.437(3) |
| C(11)-C(12) | 1.396(4) |
| C(11)-C(16) | 1.537(4) |
| C(12)-C(13) | 1.382(5) |
| C(13)-C(14) | 1.363(5) |
| C(14)-C(15) | 1.377(4) |
| C(16)-C(17) | 1.530(4) |
| C(16)-C(19) | 1.535(4) |
| C(16)-C(18) | 1.541(4) |

|                   |          |
|-------------------|----------|
| O(1)-C(2)-O(3)    | 108.2(2) |
| O(1)-C(2)-C(21)   | 111.9(2) |
| O(3)-C(2)-C(21)   | 111.0(2) |
| O(1)-C(2)-C(22)   | 105.9(2) |
| O(3)-C(2)-C(22)   | 106.2(2) |
| C(21)-C(2)-C(22)  | 113.1(3) |
| O(4)-C(4)-O(3)    | 116.2(2) |
| O(4)-C(4)-C(5)    | 127.0(2) |
| O(3)-C(4)-C(5)    | 116.7(2) |
| C(7)-C(5)-C(4)    | 120.1(2) |
| C(7)-C(5)-C(6)    | 121.5(2) |
| C(4)-C(5)-C(6)    | 117.2(2) |
| O(6)-C(6)-O(1)    | 116.9(2) |
| O(6)-C(6)-C(5)    | 126.9(3) |
| O(1)-C(6)-C(5)    | 116.1(2) |
| N(2)-C(7)-N(1)    | 118.6(2) |
| N(2)-C(7)-C(5)    | 122.3(2) |
| N(1)-C(7)-C(5)    | 119.2(2) |
| C(15)-C(10)-C(11) | 121.3(2) |
| C(15)-C(10)-N(1)  | 117.7(2) |

|                   |            |
|-------------------|------------|
| C(11)-C(10)-N(1)  | 121.1(2)   |
| C(12)-C(11)-C(10) | 115.5(3)   |
| C(12)-C(11)-C(16) | 120.5(2)   |
| C(10)-C(11)-C(16) | 124.0(2)   |
| C(13)-C(12)-C(11) | 123.3(3)   |
| C(14)-C(13)-C(12) | 119.5(3)   |
| C(13)-C(14)-C(15) | 119.5(3)   |
| C(14)-C(15)-C(10) | 120.9(3)   |
| C(17)-C(16)-C(19) | 106.6(2)   |
| C(17)-C(16)-C(11) | 110.7(2)   |
| C(19)-C(16)-C(11) | 111.7(2)   |
| C(17)-C(16)-C(18) | 110.1(2)   |
| C(19)-C(16)-C(18) | 106.0(2)   |
| C(11)-C(16)-C(18) | 111.4(2)   |
| C(7)-N(1)-C(10)   | 125.1(2)   |
| C(7)-N(2)-C(8)    | 123.2(2)   |
| C(7)-N(2)-C(9)    | 122.8(2)   |
| C(8)-N(2)-C(9)    | 114.0(2)   |
| C(6)-O(1)-C(2)    | 118.12(19) |
| C(4)-O(3)-C(2)    | 117.21(19) |

Torsion angles [°] for **16** (1794r31).

|                         |           |
|-------------------------|-----------|
| O(4)-C(4)-C(5)-C(7)     | 14.9(4)   |
| O(3)-C(4)-C(5)-C(7)     | -169.7(2) |
| O(4)-C(4)-C(5)-C(6)     | -152.9(3) |
| O(3)-C(4)-C(5)-C(6)     | 22.5(3)   |
| C(7)-C(5)-C(6)-O(6)     | -15.7(4)  |
| C(4)-C(5)-C(6)-O(6)     | 151.9(3)  |
| C(7)-C(5)-C(6)-O(1)     | 168.4(2)  |
| C(4)-C(5)-C(6)-O(1)     | -24.0(3)  |
| C(4)-C(5)-C(7)-N(2)     | 164.2(2)  |
| C(6)-C(5)-C(7)-N(2)     | -28.5(4)  |
| C(4)-C(5)-C(7)-N(1)     | -16.5(4)  |
| C(6)-C(5)-C(7)-N(1)     | 150.7(2)  |
| C(15)-C(10)-C(11)-C(12) | 1.5(4)    |
| N(1)-C(10)-C(11)-C(12)  | -179.3(2) |
| C(15)-C(10)-C(11)-C(16) | -178.9(3) |
| N(1)-C(10)-C(11)-C(16)  | 0.2(4)    |



|                         |           |
|-------------------------|-----------|
| C(10)-C(11)-C(12)-C(13) | 0.7(4)    |
| C(16)-C(11)-C(12)-C(13) | -178.9(3) |
| C(11)-C(12)-C(13)-C(14) | -1.5(5)   |
| C(12)-C(13)-C(14)-C(15) | 0.1(5)    |
| C(13)-C(14)-C(15)-C(10) | 2.0(5)    |
| C(11)-C(10)-C(15)-C(14) | -2.9(4)   |
| N(1)-C(10)-C(15)-C(14)  | 177.9(3)  |
| C(12)-C(11)-C(16)-C(17) | 119.5(3)  |
| C(10)-C(11)-C(16)-C(17) | -60.0(3)  |
| C(12)-C(11)-C(16)-C(19) | 0.8(4)    |
| C(10)-C(11)-C(16)-C(19) | -178.7(2) |
| C(12)-C(11)-C(16)-C(18) | -117.6(3) |
| C(10)-C(11)-C(16)-C(18) | 62.9(3)   |
| N(2)-C(7)-N(1)-C(10)    | -37.6(4)  |
| C(5)-C(7)-N(1)-C(10)    | 143.1(2)  |
| C(15)-C(10)-N(1)-C(7)   | -32.7(4)  |
| C(11)-C(10)-N(1)-C(7)   | 148.1(3)  |
| N(1)-C(7)-N(2)-C(8)     | 154.0(3)  |
| C(5)-C(7)-N(2)-C(8)     | -26.8(4)  |
| N(1)-C(7)-N(2)-C(9)     | -24.4(4)  |
| C(5)-C(7)-N(2)-C(9)     | 154.9(3)  |
| O(6)-C(6)-O(1)-C(2)     | 169.8(2)  |
| C(5)-C(6)-O(1)-C(2)     | -13.9(3)  |
| O(3)-C(2)-O(1)-C(6)     | 50.3(3)   |
| C(21)-C(2)-O(1)-C(6)    | -72.4(3)  |
| C(22)-C(2)-O(1)-C(6)    | 163.9(2)  |
| O(4)-C(4)-O(3)-C(2)     | -167.5(2) |
| C(5)-C(4)-O(3)-C(2)     | 16.6(3)   |
| O(1)-C(2)-O(3)-C(4)     | -51.7(3)  |
| C(21)-C(2)-O(3)-C(4)    | 71.5(3)   |
| C(22)-C(2)-O(3)-C(4)    | -165.1(3) |

Hydrogen bonds with  $H..A < r(A) + 2.000$  Angstroms and  $<DHA > 110$  deg.

| D-H | d(D-H) | d(H..A) | <DHA | d(D..A) | A |
|-----|--------|---------|------|---------|---|
|-----|--------|---------|------|---------|---|

|       |       |       |        |       |    |
|-------|-------|-------|--------|-------|----|
| N1-H1 | 0.853 | 1.923 | 142.84 | 2.654 | O4 |
|-------|-------|-------|--------|-------|----|

Table S10. Bond lengths [Å] and angles [deg] for compound **17xH<sub>2</sub>O**  
Code number1072dm6.

---

|                  |           |
|------------------|-----------|
| C(2)-O(3)        | 1.431(6)  |
| C(2)-O(1)        | 1.430(6)  |
| C(2)-C(21)       | 1.472(10) |
| C(2)-C(22)       | 1.513(12) |
| C(4)-O(4)        | 1.218(5)  |
| C(4)-O(3)        | 1.348(6)  |
| C(4)-C(5)        | 1.430(6)  |
| C(5)-C(6)        | 1.406(6)  |
| C(5)-C(7)        | 1.457(6)  |
| C(6)-O(6)        | 1.223(5)  |
| C(6)-O(1)        | 1.362(6)  |
| C(7)-N(2)        | 1.313(6)  |
| C(7)-N(1)        | 1.340(6)  |
| C(8)-C(13)       | 1.367(7)  |
| C(8)-C(9)        | 1.383(6)  |
| C(8)-N(1)        | 1.412(6)  |
| C(9)-C(10)       | 1.375(8)  |
| C(10)-C(11)      | 1.365(8)  |
| C(11)-C(12)      | 1.370(9)  |
| C(12)-C(13)      | 1.367(8)  |
| C(14)-N(2)       | 1.466(6)  |
| C(15)-N(2)       | 1.467(7)  |
| O(3)-C(2)-O(1)   | 109.5(4)  |
| O(3)-C(2)-C(21)  | 107.0(6)  |
| O(1)-C(2)-C(21)  | 107.1(6)  |
| O(3)-C(2)-C(22)  | 108.4(6)  |
| O(1)-C(2)-C(22)  | 111.5(5)  |
| C(21)-C(2)-C(22) | 113.1(7)  |
| O(4)-C(4)-O(3)   | 116.7(4)  |
| O(4)-C(4)-C(5)   | 127.4(4)  |
| O(3)-C(4)-C(5)   | 115.9(4)  |
| C(6)-C(5)-C(4)   | 120.5(4)  |
| C(6)-C(5)-C(7)   | 119.4(4)  |
| C(4)-C(5)-C(7)   | 119.5(4)  |
| O(6)-C(6)-O(1)   | 116.0(4)  |
| O(6)-C(6)-C(5)   | 126.4(4)  |
| O(1)-C(6)-C(5)   | 117.6(4)  |
| N(2)-C(7)-N(1)   | 118.8(4)  |
| N(2)-C(7)-C(5)   | 120.7(4)  |
| N(1)-C(7)-C(5)   | 120.5(4)  |
| C(13)-C(8)-C(9)  | 120.2(4)  |
| C(13)-C(8)-N(1)  | 120.8(4)  |

|                   |          |
|-------------------|----------|
| C(9)-C(8)-N(1)    | 119.0(4) |
| C(10)-C(9)-C(8)   | 119.1(5) |
| C(11)-C(10)-C(9)  | 120.5(5) |
| C(10)-C(11)-C(12) | 120.0(5) |
| C(13)-C(12)-C(11) | 120.0(5) |
| C(12)-C(13)-C(8)  | 120.1(5) |
| C(7)-N(1)-C(8)    | 124.4(4) |
| C(7)-N(2)-C(14)   | 121.0(4) |
| C(7)-N(2)-C(15)   | 123.5(4) |
| C(14)-N(2)-C(15)  | 115.3(4) |
| C(6)-O(1)-C(2)    | 117.9(4) |
| C(4)-O(3)-C(2)    | 117.6(4) |

Torsion angles [deg] for **17xH<sub>2</sub>O** (1072dm6).

|                         |           |
|-------------------------|-----------|
| O(4)-C(4)-C(5)-C(6)     | 174.6(5)  |
| O(3)-C(4)-C(5)-C(6)     | -4.8(6)   |
| O(4)-C(4)-C(5)-C(7)     | 2.9(7)    |
| O(3)-C(4)-C(5)-C(7)     | -176.5(4) |
| C(4)-C(5)-C(6)-O(6)     | -168.4(5) |
| C(7)-C(5)-C(6)-O(6)     | 3.3(7)    |
| C(4)-C(5)-C(6)-O(1)     | 10.7(6)   |
| C(7)-C(5)-C(6)-O(1)     | -177.6(4) |
| C(6)-C(5)-C(7)-N(2)     | 58.7(6)   |
| C(4)-C(5)-C(7)-N(2)     | -129.6(4) |
| C(6)-C(5)-C(7)-N(1)     | -121.3(5) |
| C(4)-C(5)-C(7)-N(1)     | 50.5(5)   |
| C(13)-C(8)-C(9)-C(10)   | -1.6(7)   |
| N(1)-C(8)-C(9)-C(10)    | -179.6(5) |
| C(8)-C(9)-C(10)-C(11)   | 0.4(8)    |
| C(9)-C(10)-C(11)-C(12)  | 1.8(8)    |
| C(10)-C(11)-C(12)-C(13) | -2.9(8)   |
| C(11)-C(12)-C(13)-C(8)  | 1.7(7)    |
| C(9)-C(8)-C(13)-C(12)   | 0.5(6)    |
| N(1)-C(8)-C(13)-C(12)   | 178.5(4)  |
| N(2)-C(7)-N(1)-C(8)     | -166.9(4) |
| C(5)-C(7)-N(1)-C(8)     | 13.1(6)   |
| C(13)-C(8)-N(1)-C(7)    | 53.0(6)   |
| C(9)-C(8)-N(1)-C(7)     | -129.0(5) |
| N(1)-C(7)-N(2)-C(14)    | 5.8(6)    |
| C(5)-C(7)-N(2)-C(14)    | -174.1(4) |
| N(1)-C(7)-N(2)-C(15)    | -169.2(4) |
| C(5)-C(7)-N(2)-C(15)    | 10.9(6)   |
| O(6)-C(6)-O(1)-C(2)     | -164.6(5) |
| C(5)-C(6)-O(1)-C(2)     | 16.2(7)   |
| O(3)-C(2)-O(1)-C(6)     | -45.7(7)  |
| C(21)-C(2)-O(1)-C(6)    | -161.4(6) |
| C(22)-C(2)-O(1)-C(6)    | 74.3(6)   |
| O(4)-C(4)-O(3)-C(2)     | 152.8(5)  |
| C(5)-C(4)-O(3)-C(2)     | -27.8(7)  |

|                      |          |
|----------------------|----------|
| O(1)-C(2)-O(3)-C(4)  | 52.2(7)  |
| C(21)-C(2)-O(3)-C(4) | 168.0(6) |
| C(22)-C(2)-O(3)-C(4) | -69.7(6) |

Hydrogen bonds with  $H..A < r(A) + 2.000$  Angstroms and  $<DHA > 110$  deg.

| D-H     | d(D-H) | d(H..A) | <DHA   | d(D..A) | A                         |
|---------|--------|---------|--------|---------|---------------------------|
| N1-H1   | 0.790  | 2.127   | 151.33 | 2.845   | O20 [ x+1/2, -y, z-1/2 ]  |
| O20-H21 | 0.879  | 2.090   | 151.87 | 2.895   | O4                        |
| O20-H22 | 0.991  | 1.906   | 164.63 | 2.874   | O6 [ x-1/2, -y+1, z+1/2 ] |

Table S11. Bond lengths [Å] and angles [deg] for compound **18xTHF**  
Code number 975dm1.

|             |           |
|-------------|-----------|
| N(1)-C(7)   | 1.333(5)  |
| N(1)-C(8)   | 1.432(5)  |
| N(2)-C(7)   | 1.319(5)  |
| N(2)-C(17)  | 1.457(5)  |
| N(2)-C(18)  | 1.465(5)  |
| C(2)-O(1)   | 1.424(6)  |
| C(2)-O(3)   | 1.431(5)  |
| C(2)-C(21)  | 1.516(7)  |
| C(2)-C(22)  | 1.516(6)  |
| C(4)-O(4)   | 1.216(5)  |
| C(4)-O(3)   | 1.375(5)  |
| C(4)-C(5)   | 1.420(5)  |
| C(5)-C(6)   | 1.416(5)  |
| C(5)-C(7)   | 1.461(5)  |
| C(6)-O(6)   | 1.215(5)  |
| C(6)-O(1)   | 1.376(5)  |
| C(8)-C(9)   | 1.394(6)  |
| C(8)-C(13)  | 1.395(6)  |
| C(9)-C(10)  | 1.390(7)  |
| C(9)-C(14)  | 1.529(7)  |
| C(10)-C(11) | 1.387(7)  |
| C(11)-C(12) | 1.373(7)  |
| C(11)-C(15) | 1.514(7)  |
| C(12)-C(13) | 1.391(7)  |
| C(13)-C(16) | 1.497(6)  |
| O(2A)-C(1A) | 1.360(18) |
| O(2A)-C(4A) | 1.380(18) |
| C(1A)-C(2A) | 1.430(17) |
| C(2A)-C(3A) | 1.372(18) |

|                   |           |
|-------------------|-----------|
| C(3A)-C(4A)       | 1.315(17) |
| O(2B)-C(1B)       | 1.40(2)   |
| O(2B)-C(4B)       | 1.438(19) |
| C(1B)-C(2B)       | 1.43(2)   |
| C(1B)-C(4B)       | 1.87(4)   |
| C(2B)-C(3B)       | 1.41(2)   |
| C(3B)-C(4B)       | 1.44(2)   |
|                   |           |
| C(7)-N(1)-C(8)    | 125.6(3)  |
| C(7)-N(2)-C(17)   | 121.5(3)  |
| C(7)-N(2)-C(18)   | 122.5(3)  |
| C(17)-N(2)-C(18)  | 115.8(3)  |
| O(1)-C(2)-O(3)    | 109.6(3)  |
| O(1)-C(2)-C(21)   | 111.2(4)  |
| O(3)-C(2)-C(21)   | 109.9(4)  |
| O(1)-C(2)-C(22)   | 106.3(4)  |
| O(3)-C(2)-C(22)   | 106.1(4)  |
| C(21)-C(2)-C(22)  | 113.5(4)  |
| O(4)-C(4)-O(3)    | 116.7(3)  |
| O(4)-C(4)-C(5)    | 127.2(4)  |
| O(3)-C(4)-C(5)    | 116.0(4)  |
| C(6)-C(5)-C(4)    | 121.0(4)  |
| C(6)-C(5)-C(7)    | 118.2(3)  |
| C(4)-C(5)-C(7)    | 120.5(3)  |
| O(6)-C(6)-O(1)    | 116.1(4)  |
| O(6)-C(6)-C(5)    | 127.0(4)  |
| O(1)-C(6)-C(5)    | 116.7(4)  |
| N(2)-C(7)-N(1)    | 118.6(3)  |
| N(2)-C(7)-C(5)    | 121.7(3)  |
| N(1)-C(7)-C(5)    | 119.7(4)  |
| C(9)-C(8)-C(13)   | 121.5(4)  |
| C(9)-C(8)-N(1)    | 118.9(4)  |
| C(13)-C(8)-N(1)   | 119.4(4)  |
| C(10)-C(9)-C(8)   | 117.9(4)  |
| C(10)-C(9)-C(14)  | 120.5(4)  |
| C(8)-C(9)-C(14)   | 121.6(4)  |
| C(11)-C(10)-C(9)  | 122.2(4)  |
| C(12)-C(11)-C(10) | 117.9(4)  |
| C(12)-C(11)-C(15) | 121.7(6)  |
| C(10)-C(11)-C(15) | 120.4(5)  |
| C(11)-C(12)-C(13) | 122.7(5)  |
| C(12)-C(13)-C(8)  | 117.7(4)  |
| C(12)-C(13)-C(16) | 120.0(4)  |
| C(8)-C(13)-C(16)  | 122.3(4)  |
| C(6)-O(1)-C(2)    | 117.9(3)  |
| C(4)-O(3)-C(2)    | 118.0(3)  |
| C(1A)-O(2A)-C(4A) | 115(2)    |
| O(2A)-C(1A)-C(2A) | 98.7(18)  |
| C(3A)-C(2A)-C(1A) | 106.1(17) |
| C(4A)-C(3A)-C(2A) | 113(2)    |

|                   |           |
|-------------------|-----------|
| C(3A)-C(4A)-O(2A) | 101(2)    |
| C(1B)-O(2B)-C(4B) | 82(2)     |
| O(2B)-C(1B)-C(2B) | 101.6(16) |
| O(2B)-C(1B)-C(4B) | 49.7(13)  |
| C(2B)-C(1B)-C(4B) | 80.6(13)  |
| C(3B)-C(2B)-C(1B) | 99.8(15)  |
| C(2B)-C(3B)-C(4B) | 98.4(15)  |
| O(2B)-C(4B)-C(3B) | 101.0(17) |
| O(2B)-C(4B)-C(1B) | 47.9(12)  |
| C(3B)-C(4B)-C(1B) | 81.2(12)  |

Torsion angles [deg] for **18xTHF** (975dm1).

|                         |           |
|-------------------------|-----------|
| O(4)-C(4)-C(5)-C(6)     | -169.5(4) |
| O(3)-C(4)-C(5)-C(6)     | 9.0(6)    |
| O(4)-C(4)-C(5)-C(7)     | 3.9(7)    |
| O(3)-C(4)-C(5)-C(7)     | -177.6(3) |
| C(4)-C(5)-C(6)-O(6)     | 164.3(5)  |
| C(7)-C(5)-C(6)-O(6)     | -9.2(7)   |
| C(4)-C(5)-C(6)-O(1)     | -10.0(6)  |
| C(7)-C(5)-C(6)-O(1)     | 176.5(4)  |
| C(17)-N(2)-C(7)-N(1)    | -10.9(5)  |
| C(18)-N(2)-C(7)-N(1)    | 165.2(3)  |
| C(17)-N(2)-C(7)-C(5)    | 170.5(4)  |
| C(18)-N(2)-C(7)-C(5)    | -13.4(5)  |
| C(8)-N(1)-C(7)-N(2)     | 165.3(3)  |
| C(8)-N(1)-C(7)-C(5)     | -16.1(5)  |
| C(6)-C(5)-C(7)-N(2)     | 117.5(4)  |
| C(4)-C(5)-C(7)-N(2)     | -56.1(5)  |
| C(6)-C(5)-C(7)-N(1)     | -61.0(5)  |
| C(4)-C(5)-C(7)-N(1)     | 125.4(4)  |
| C(7)-N(1)-C(8)-C(9)     | 117.4(4)  |
| C(7)-N(1)-C(8)-C(13)    | -67.4(5)  |
| C(13)-C(8)-C(9)-C(10)   | 2.4(6)    |
| N(1)-C(8)-C(9)-C(10)    | 177.5(4)  |
| C(13)-C(8)-C(9)-C(14)   | -176.1(4) |
| N(1)-C(8)-C(9)-C(14)    | -0.9(6)   |
| C(8)-C(9)-C(10)-C(11)   | 0.9(7)    |
| C(14)-C(9)-C(10)-C(11)  | 179.4(5)  |
| C(9)-C(10)-C(11)-C(12)  | -3.2(7)   |
| C(9)-C(10)-C(11)-C(15)  | 177.2(5)  |
| C(10)-C(11)-C(12)-C(13) | 2.4(7)    |
| C(15)-C(11)-C(12)-C(13) | -178.0(5) |
| C(11)-C(12)-C(13)-C(8)  | 0.7(7)    |
| C(11)-C(12)-C(13)-C(16) | -178.7(4) |
| C(9)-C(8)-C(13)-C(12)   | -3.2(6)   |
| N(1)-C(8)-C(13)-C(12)   | -178.3(4) |
| C(9)-C(8)-C(13)-C(16)   | 176.2(4)  |

|                         |           |
|-------------------------|-----------|
| N(1)-C(8)-C(13)-C(16)   | 1.1(6)    |
| O(6)-C(6)-O(1)-C(2)     | 164.8(4)  |
| C(5)-C(6)-O(1)-C(2)     | -20.2(6)  |
| O(3)-C(2)-O(1)-C(6)     | 48.3(5)   |
| C(21)-C(2)-O(1)-C(6)    | -73.4(5)  |
| C(22)-C(2)-O(1)-C(6)    | 162.7(4)  |
| O(4)-C(4)-O(3)-C(2)     | -159.3(4) |
| C(5)-C(4)-O(3)-C(2)     | 22.0(5)   |
| O(1)-C(2)-O(3)-C(4)     | -49.5(5)  |
| C(21)-C(2)-O(3)-C(4)    | 73.0(5)   |
| C(22)-C(2)-O(3)-C(4)    | -163.9(4) |
| C(4A)-O(2A)-C(1A)-C(2A) | 27(3)     |
| O(2A)-C(1A)-C(2A)-C(3A) | -21(2)    |
| C(1A)-C(2A)-C(3A)-C(4A) | 10(3)     |
| C(2A)-C(3A)-C(4A)-O(2A) | 6(3)      |
| C(1A)-O(2A)-C(4A)-C(3A) | -22(4)    |
| C(4B)-O(2B)-C(1B)-C(2B) | -67(3)    |
| O(2B)-C(1B)-C(2B)-C(3B) | 45(4)     |
| C(4B)-C(1B)-C(2B)-C(3B) | 0(3)      |
| C(1B)-C(2B)-C(3B)-C(4B) | 1(4)      |
| C(1B)-O(2B)-C(4B)-C(3B) | 67(3)     |
| C(2B)-C(3B)-C(4B)-O(2B) | -44(4)    |
| C(2B)-C(3B)-C(4B)-C(1B) | 0(3)      |
| C(2B)-C(1B)-C(4B)-O(2B) | 114(3)    |
| O(2B)-C(1B)-C(4B)-C(3B) | -114(3)   |
| C(2B)-C(1B)-C(4B)-C(3B) | 0(3)      |

Hydrogen bonds with  $H..A < r(A) + 2.000$  Angstroms and  $<DHA > 110$  deg.

| D-H   | d(D-H) | d(H..A) | <DHA   | d(D..A) | A                            |
|-------|--------|---------|--------|---------|------------------------------|
| N1-H1 | 0.836  | 2.079   | 151.42 | 2.842   | O4 [ -x+1/2, y+1/2, -z+1/2 ] |

Table S12. Bond lengths [ $\text{\AA}$ ] and angles [ $^\circ$ ] for compound **19xH<sub>2</sub>O**

Code number cw2169.

|             |          |
|-------------|----------|
| C(2)-O(1)#1 | 1.427(3) |
| C(2)-O(1)   | 1.427(3) |
| C(2)-C(21)  | 1.497(6) |
| C(2)-C(22)  | 1.504(5) |
| C(5)-C(6)   | 1.397(3) |
| C(5)-C(6)#1 | 1.397(3) |
| C(5)-C(7)   | 1.484(5) |

|                   |            |
|-------------------|------------|
| C(6)-O(6)         | 1.230(3)   |
| C(6)-O(1)         | 1.368(3)   |
| C(7)-N(2)         | 1.310(4)   |
| C(7)-N(1)         | 1.319(4)   |
| C(8)-N(1)         | 1.492(5)   |
| C(8)-C(9)         | 1.516(4)   |
| C(8)-C(9)#1       | 1.516(4)   |
| C(8)-C(10)        | 1.518(6)   |
| C(11)-C(12)#1     | 1.436(7)   |
| C(11)-C(12)       | 1.436(7)   |
| C(11)-N(2)        | 1.490(4)   |
| C(11)-C(13)#1     | 1.522(8)   |
| C(11)-C(13)       | 1.522(8)   |
| C(11)-C(14)#1     | 1.537(9)   |
| C(11)-C(14)       | 1.537(9)   |
| C(12)-C(14)#1     | 1.295(13)  |
| C(12)-C(13)#1     | 1.507(16)  |
| C(13)-C(13)#1     | 1.36(2)    |
| C(13)-C(12)#1     | 1.507(16)  |
| C(14)-C(12)#1     | 1.295(13)  |
| C(14)-C(14)#1     | 1.542(18)  |
|                   |            |
| O(1)#1-C(2)-O(1)  | 111.0(3)   |
| O(1)#1-C(2)-C(21) | 110.22(18) |
| O(1)-C(2)-C(21)   | 110.22(18) |
| O(1)#1-C(2)-C(22) | 107.08(18) |
| O(1)-C(2)-C(22)   | 107.08(18) |
| C(21)-C(2)-C(22)  | 111.1(3)   |
| C(6)-C(5)-C(6)#1  | 122.4(3)   |
| C(6)-C(5)-C(7)    | 118.07(14) |
| C(6)#1-C(5)-C(7)  | 118.07(14) |
| O(6)-C(6)-O(1)    | 116.54(19) |
| O(6)-C(6)-C(5)    | 126.8(2)   |
| O(1)-C(6)-C(5)    | 116.61(19) |



|                       |            |
|-----------------------|------------|
| N(2)-C(7)-N(1)        | 115.1(3)   |
| N(2)-C(7)-C(5)        | 122.0(3)   |
| N(1)-C(7)-C(5)        | 122.9(3)   |
| N(1)-C(8)-C(9)        | 111.33(19) |
| N(1)-C(8)-C(9)#1      | 111.3(2)   |
| C(9)-C(8)-C(9)#1      | 109.3(3)   |
| N(1)-C(8)-C(10)       | 104.4(3)   |
| C(9)-C(8)-C(10)       | 110.2(2)   |
| C(9)#1-C(8)-C(10)     | 110.2(2)   |
| C(12)#1-C(11)-C(12)   | 145.1(7)   |
| C(12)#1-C(11)-N(2)    | 107.4(3)   |
| C(12)-C(11)-N(2)      | 107.4(3)   |
| C(12)#1-C(11)-C(13)#1 | 111.9(7)   |
| C(12)-C(11)-C(13)#1   | 61.2(7)    |
| N(2)-C(11)-C(13)#1    | 105.4(4)   |
| C(12)#1-C(11)-C(13)   | 61.2(7)    |
| C(12)-C(11)-C(13)     | 111.9(7)   |
| N(2)-C(11)-C(13)      | 105.4(4)   |
| C(13)#1-C(11)-C(13)   | 53.2(10)   |
| C(12)#1-C(11)-C(14)#1 | 109.5(7)   |
| C(12)-C(11)-C(14)#1   | 51.5(5)    |
| N(2)-C(11)-C(14)#1    | 114.1(3)   |
| C(13)#1-C(11)-C(14)#1 | 108.5(6)   |
| C(13)-C(11)-C(14)#1   | 140.1(5)   |
| C(12)#1-C(11)-C(14)   | 51.5(5)    |
| C(12)-C(11)-C(14)     | 109.5(7)   |
| N(2)-C(11)-C(14)      | 114.1(3)   |
| C(13)#1-C(11)-C(14)   | 140.1(5)   |
| C(13)-C(11)-C(14)     | 108.5(6)   |
| C(14)#1-C(11)-C(14)   | 60.2(8)    |
| C(14)#1-C(12)-C(11)   | 68.3(5)    |
| C(14)#1-C(12)-C(13)#1 | 124.6(7)   |
| C(11)-C(12)-C(13)#1   | 62.2(5)    |
| C(13)#1-C(13)-C(12)#1 | 117.2(5)   |

|                       |            |
|-----------------------|------------|
| C(13)#1-C(13)-C(11)   | 63.4(5)    |
| C(12)#1-C(13)-C(11)   | 56.6(4)    |
| C(12)#1-C(14)-C(11)   | 60.2(5)    |
| C(12)#1-C(14)-C(14)#1 | 117.5(5)   |
| C(11)-C(14)-C(14)#1   | 59.9(4)    |
| C(7)-N(1)-C(8)        | 132.0(3)   |
| C(7)-N(2)-C(11)       | 135.1(3)   |
| C(6)-O(1)-C(2)        | 118.13(18) |

#### Selected torsion angles

|                |                               |
|----------------|-------------------------------|
| -170.29 (0.18) | C6_\$1 - C5 - C6 - O6         |
| -4.44 (0.40)   | C7 - C5 - C6 - O6             |
| 6.86 (0.43)    | C6_\$1 - C5 - C6 - O1         |
| 172.71 (0.23)  | C7 - C5 - C6 - O1             |
| -83.23 (0.22)  | C6 - C5 - C7 - N2             |
| 83.23 (0.22)   | C6_\$1 - C5 - C7 - N2         |
| 96.77 (0.22)   | C6 - C5 - C7 - N1             |
| -96.77 (0.22)  | C6_\$1 - C5 - C7 - N1         |
| 66.80 (1.76)   | C12_\$1 - C11 - C12 - C14_\$1 |
| -107.31 (0.50) | N2 - C11 - C12 - C14_\$1      |
| 154.31 (0.70)  | C13_\$1 - C11 - C12 - C14_\$1 |
| 137.49 (0.69)  | C13 - C11 - C12 - C14_\$1     |
| 17.06 (0.49)   | C14 - C11 - C12 - C14_\$1     |
| -87.51 (1.75)  | C12_\$1 - C11 - C12 - C13_\$1 |
| 98.38 (0.51)   | N2 - C11 - C12 - C13_\$1      |
| -16.82 (0.52)  | C13 - C11 - C12 - C13_\$1     |
| -154.31 (0.70) | C14_\$1 - C11 - C12 - C13_\$1 |
| -137.25 (0.61) | C14 - C11 - C12 - C13_\$1     |
| 160.42 (0.40)  | C12_\$1 - C11 - C13 - C13_\$1 |
| 18.46 (0.44)   | C12 - C11 - C13 - C13_\$1     |
| -97.93 (0.31)  | N2 - C11 - C13 - C13_\$1      |
| 74.02 (0.98)   | C14_\$1 - C11 - C13 - C13_\$1 |
| 139.46 (0.45)  | C14 - C11 - C13 - C13_\$1     |
| -141.97 (0.83) | C12 - C11 - C13 - C12_\$1     |

101.64 ( 0.46) N2 - C11 - C13 - C12\_\$1  
-160.42 ( 0.41) C13\_\$1 - C11 - C13 - C12\_\$1  
-86.40 ( 1.18) C14\_\$1 - C11 - C13 - C12\_\$1  
-20.96 ( 0.58) C14 - C11 - C13 - C12\_\$1  
146.08 ( 0.81) C12 - C11 - C14 - C12\_\$1  
-93.56 ( 0.49) N2 - C11 - C14 - C12\_\$1  
77.95 ( 1.25) C13\_\$1 - C11 - C14 - C12\_\$1  
23.62 ( 0.64) C13 - C11 - C14 - C12\_\$1  
161.42 ( 0.43) C14\_\$1 - C11 - C14 - C12\_\$1  
-161.42 ( 0.43) C12\_\$1 - C11 - C14 - C14\_\$1  
-15.34 ( 0.39) C12 - C11 - C14 - C14\_\$1  
105.02 ( 0.33) N2 - C11 - C14 - C14\_\$1  
-83.48 ( 1.07) C13\_\$1 - C11 - C14 - C14\_\$1  
-137.80 ( 0.47) C13 - C11 - C14 - C14\_\$1  
180.00 ( 0.00) N2 - C7 - N1 - C8  
0.00 ( 0.00) C5 - C7 - N1 - C8  
-61.13 ( 0.22) C9 - C8 - N1 - C7  
61.13 ( 0.22) C9\_\$1 - C8 - N1 - C7  
180.00 ( 0.00) C10 - C8 - N1 - C7  
180.00 ( 0.00) N1 - C7 - N2 - C11  
0.00 ( 0.00) C5 - C7 - N2 - C11  
-88.24 ( 0.57) C12\_\$1 - C11 - N2 - C7  
88.24 ( 0.57) C12 - C11 - N2 - C7  
152.31 ( 0.55) C13\_\$1 - C11 - N2 - C7  
-152.31 ( 0.55) C13 - C11 - N2 - C7  
33.33 ( 0.47) C14\_\$1 - C11 - N2 - C7  
-33.33 ( 0.47) C14 - C11 - N2 - C7  
-162.24 ( 0.23) O6 - C6 - O1 - C2  
20.31 ( 0.31) C5 - C6 - O1 - C2  
-44.98 ( 0.32) O1\_\$1 - C2 - O1 - C6  
77.44 ( 0.29) C21 - C2 - O1 - C6  
-161.54 ( 0.26) C22 - C2 - O1 - C6

Hydrogen bonds with  $H..A < r(A) + 2.000$  Angstroms and  $\langle DHA \rangle 110$  deg.

| D-H    | d(D-H) | d(H..A) | <DHA   | d(D..A) | A                            |
|--------|--------|---------|--------|---------|------------------------------|
| N1-H1  | 0.860  | 2.062   | 164.84 | 2.901   | O2 [ x, y, z+1 ]             |
| N2-H2  | 0.860  | 2.204   | 159.47 | 3.024   | O2 [ x, y, z+1 ]             |
| O2-H11 | 0.949  | 1.895   | 156.51 | 2.791   | O6 [ -x+3/2, -y+3/2, z-1/2 ] |

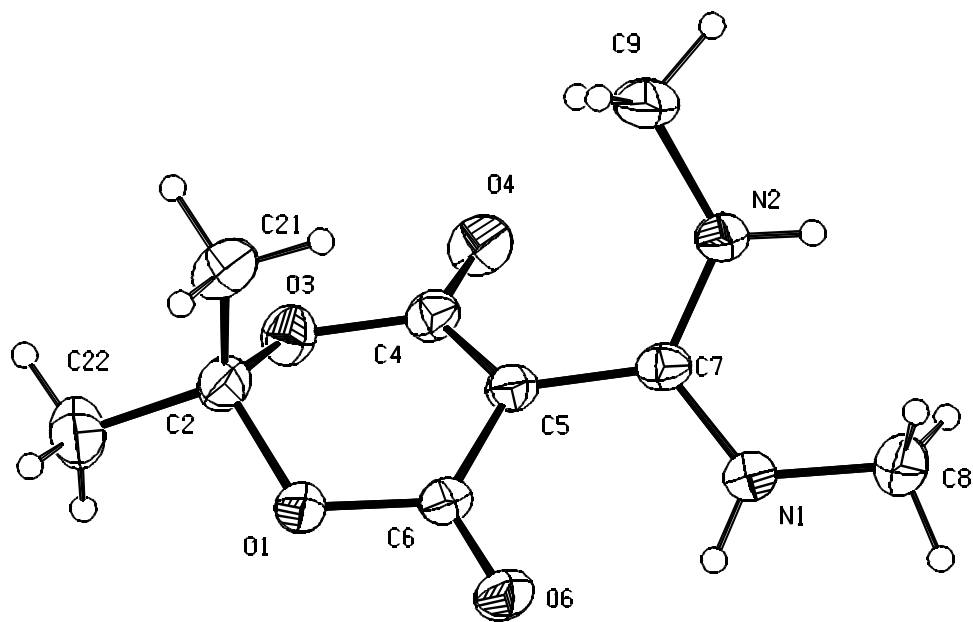

Figure S1. View of compound **10**

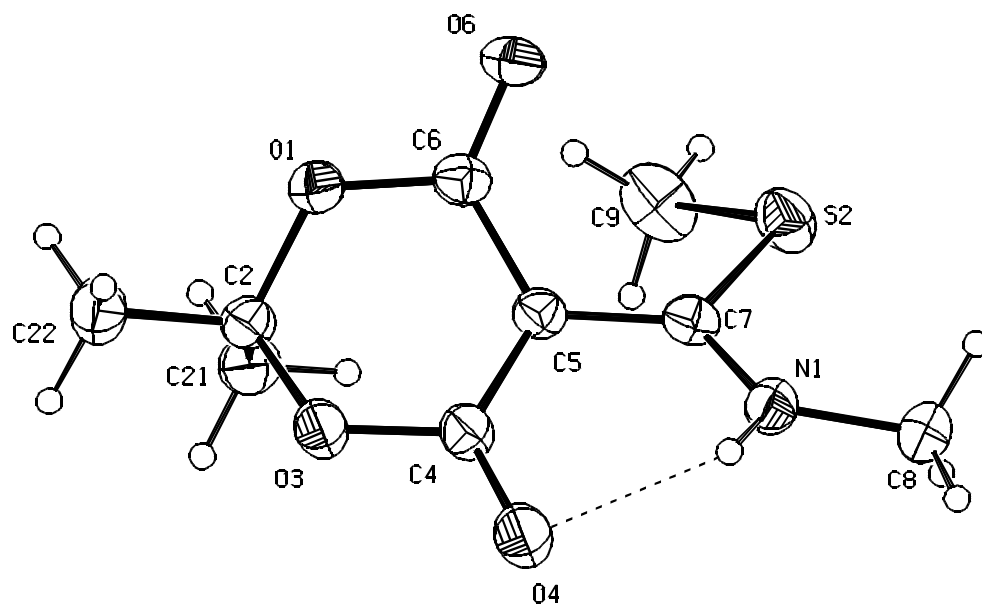

Figure S2. View of compound **11**

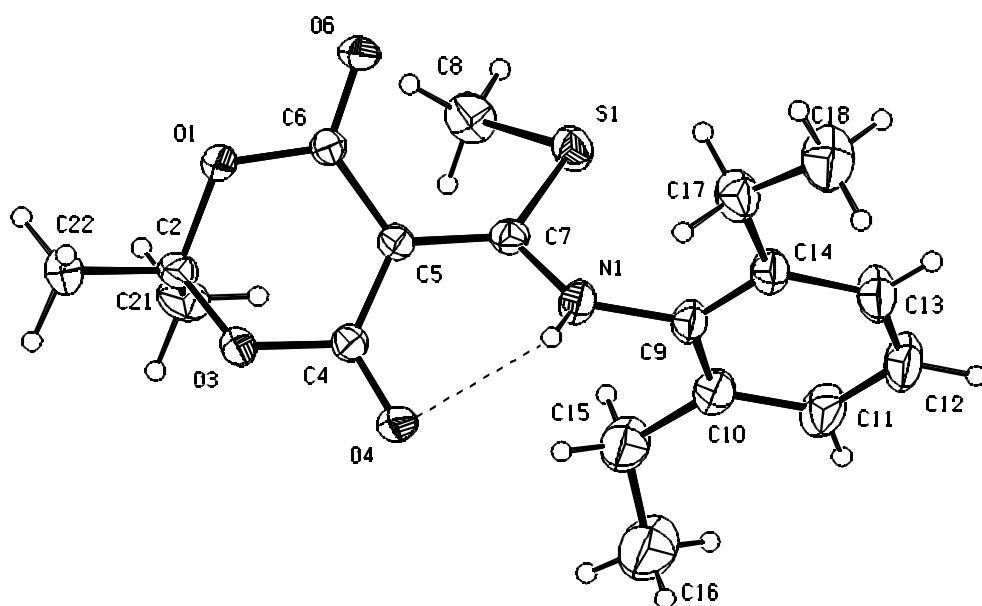

Figure S3. View of compound **13**

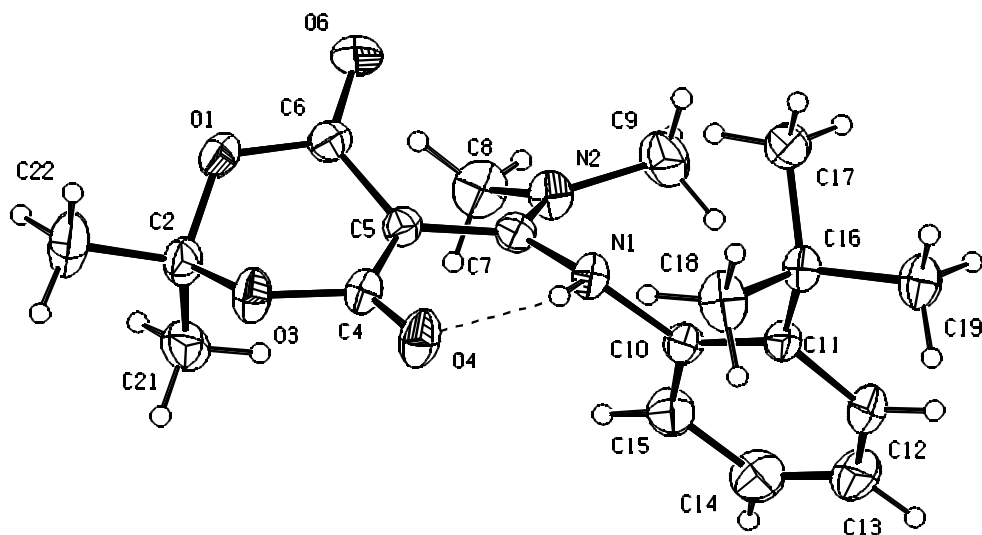

Figure S4. View of compound **16**



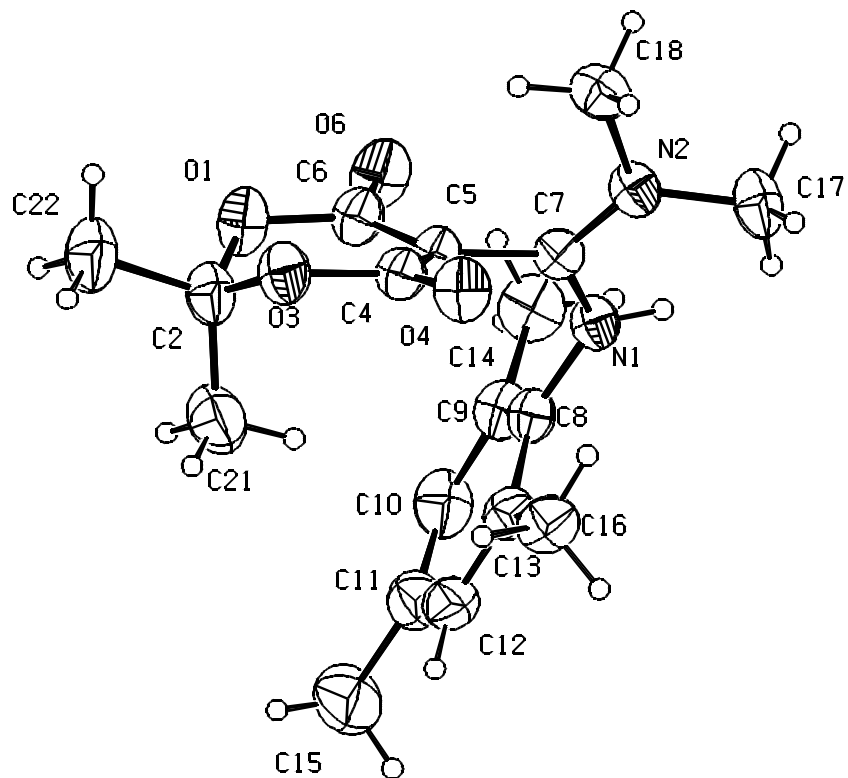

Figure S5. View of compound 18

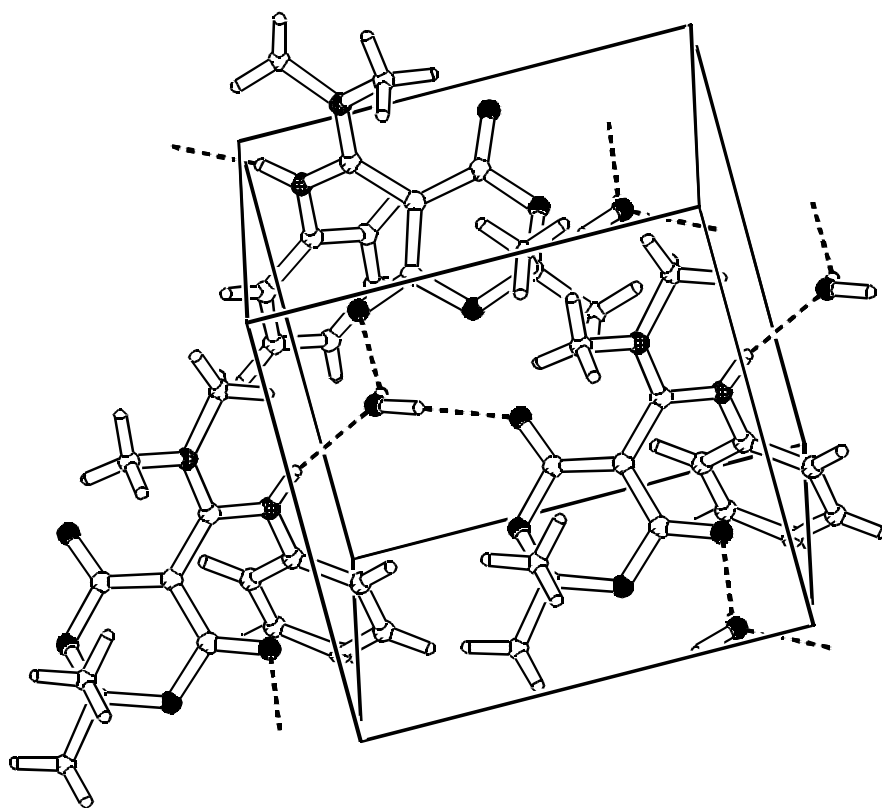

Figure S6. Packing diagram for (17)·H<sub>2</sub>O showing H-bonding

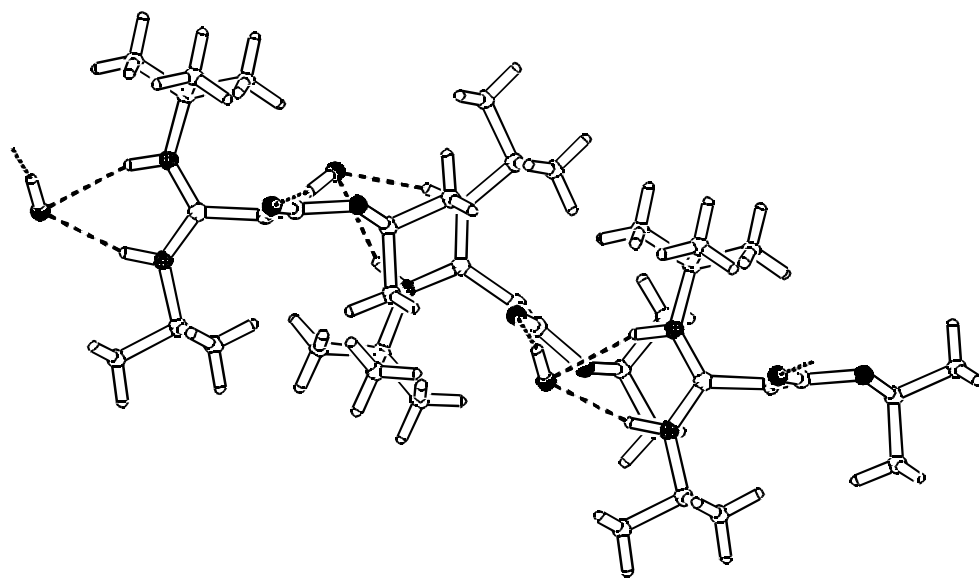

Figure S7. Packing diagram for **(19).H<sub>2</sub>O** showing H-bonding
